# Supplementary material
Source: publisher figshare collection journal article supplement (https://sage.figshare.com/ndownloader/files/14569535)
Supplement: Supplementary file 1 [file 14569535]

## Sheet: Sheet1
Sample ID	drugName	finalTarget	directTarget	iCAGESGeneScore	maxBioSystemsScore	maxActivityScore	icagesDrugScore	tier
TCGA-A3-3357-01	EVEROLIMUS	PIK3CA	PIK3CA	0.6235	1	1	0.6235	1
TCGA-A3-3357-01	CABOZANTINIB	PIK3CA	PIK3CA	0.6235	1	0.999913	0.623446	1
TCGA-A3-3357-01	GSK2126458	PIK3CA	PIK3CA	0.6235	1	0.999739	0.623337	2
TCGA-A3-3357-01	MK-2206	PIK3CA	PIK3CA	0.6235	1	0.959349	0.598154	2
TCGA-A3-3363-01	KX2-391	SRC	SRC	0.5187	1	0.999992	0.518696	2
TCGA-A3-3376-01	GSK2126458	PIK3R1	PIK3R1	0.5807	1	0.999739	0.580548	2
TCGA-AK-3425-01	ROMIDEPSIN	HDAC1	HDAC1	0.5051	1	1	0.5051	1
TCGA-AK-3425-01	ENTINOSTAT	HDAC1	HDAC1	0.5051	1	0.999811	0.505004	2
TCGA-AK-3425-01	CUDC-101	HDAC1	HDAC1	0.5051	1	0.994026	0.502082	3
TCGA-AK-3460-01	LENVATINIB	PDGFRA	PDGFRA	0.5179	1	1	0.5179	1
TCGA-AK-3460-01	SORAFENIB	PDGFRA	PDGFRA	0.5179	1	0.999991	0.517896	1
TCGA-AK-3460-01	VATALANIB	PDGFRA	PDGFRA	0.5179	1	1	0.5179	2
TCGA-AK-3460-01	AMUVATINIB	PDGFRA	PDGFRA	0.5179	1	1	0.5179	2
TCGA-AK-3460-01	TELATINIB	PDGFRA	PDGFRA	0.5179	1	0.970063	0.502396	3
TCGA-B0-4693-01	EVEROLIMUS	PIK3CA	PIK3CA	0.6235	1	1	0.6235	1
TCGA-B0-4693-01	CABOZANTINIB	PIK3CA	PIK3CA	0.6235	1	0.999913	0.623446	1
TCGA-B0-4693-01	GSK2126458	PIK3CA	PIK3CA	0.6235	1	0.999739	0.623337	2
TCGA-B0-4693-01	MK-2206	PIK3CA	PIK3CA	0.6235	1	0.959349	0.598154	2
TCGA-B0-4710-01	DOXORUBICIN	TP53	TP53	1	1	0.519849	0.519849	2
TCGA-B0-4810-01	GSK2126458	PIK3R2	PIK3R2	0.5168	1	0.999739	0.516665	2
TCGA-B0-4810-01	SOPHORETIN	PIK3R2	PIK3R2	0.5168	1	1	0.5168	3
TCGA-B0-4849-01	VANDETANIB	EGFR	EGFR	0.6876	1	0.875357	0.601896	1
TCGA-B0-4849-01	ERLOTINIB	EGFR	EGFR	0.6876	1	0.860542	0.591709	1
TCGA-B0-4849-01	GEFITINIB	EGFR	EGFR	0.6876	1	0.727994	0.500569	1
TCGA-B0-4849-01	SIROLIMUS	EGFR	EGFR	0.6876	1	1	0.6876	2
TCGA-B0-4849-01	PACLITAXEL	EGFR	EGFR	0.6876	1	1	0.6876	2
TCGA-B0-4849-01	LIDOCAINE	EGFR	EGFR	0.6876	1	0.770651	0.5299	2
TCGA-B0-4849-01	CUDC-101	EGFR	EGFR	0.6876	1	0.994026	0.683492	3
TCGA-B0-5116-01	VANDETANIB	EGFR	EGFR	0.6876	1	0.875357	0.601896	1
TCGA-B0-5116-01	ERLOTINIB	EGFR	EGFR	0.6876	1	0.860542	0.591709	1
TCGA-B0-5116-01	GEFITINIB	EGFR	EGFR	0.6876	1	0.727994	0.500569	1
TCGA-B0-5116-01	SIROLIMUS	EGFR	EGFR	0.6876	1	1	0.6876	2
TCGA-B0-5116-01	PACLITAXEL	EGFR	EGFR	0.6876	1	1	0.6876	2
TCGA-B0-5116-01	LIDOCAINE	EGFR	EGFR	0.6876	1	0.770651	0.5299	2
TCGA-B0-5116-01	CUDC-101	EGFR	EGFR	0.6876	1	0.994026	0.683492	3
TCGA-B0-5121-01	LENVATINIB	PDGFRA	PDGFRA	0.5179	1	1	0.5179	1
TCGA-B0-5121-01	SORAFENIB	PDGFRA	PDGFRA	0.5179	1	0.999991	0.517896	1
TCGA-B0-5121-01	VATALANIB	PDGFRA	PDGFRA	0.5179	1	1	0.5179	2
TCGA-B0-5121-01	AMUVATINIB	PDGFRA	PDGFRA	0.5179	1	1	0.5179	2
TCGA-B0-5121-01	TELATINIB	PDGFRA	PDGFRA	0.5179	1	0.970063	0.502396	3
TCGA-B0-5400-01	EVEROLIMUS	KRAS	KRAS	0.6499	1	1	0.6499	1
TCGA-B0-5400-01	TRAMETINIB	KRAS	KRAS	0.6499	1	0.935031	0.607677	1
TCGA-B0-5400-01	VANDETANIB	KRAS	KRAS	0.6499	1	0.875357	0.568895	1
TCGA-B0-5400-01	ERLOTINIB	KRAS	KRAS	0.6499	1	0.860542	0.559266	1
TCGA-B0-5400-01	DASATINIB	KRAS	KRAS	0.6499	1	0.846425	0.550092	1
TCGA-B0-5400-01	PACLITAXEL	KRAS	KRAS	0.6499	1	1	0.6499	2
TCGA-B0-5400-01	DECITABINE	KRAS	KRAS	0.6499	1	0.774422	0.503297	2
TCGA-B0-5707-01	ROMIDEPSIN	HDAC1	HDAC1	0.5051	1	1	0.5051	1
TCGA-B0-5707-01	ENTINOSTAT	HDAC1	HDAC1	0.5051	1	0.999811	0.505004	2
TCGA-B0-5707-01	CUDC-101	HDAC1	HDAC1	0.5051	1	0.994026	0.502082	3
TCGA-B0-5713-01	EVEROLIMUS	PIK3CA	PIK3CA	0.6235	1	1	0.6235	1
TCGA-B0-5713-01	CABOZANTINIB	PIK3CA	PIK3CA	0.6235	1	0.999913	0.623446	1
TCGA-B0-5713-01	VANDETANIB	EGFR	EGFR	0.6876	1	0.875357	0.601896	1
TCGA-B0-5713-01	ERLOTINIB	EGFR	EGFR	0.6876	1	0.860542	0.591709	1
TCGA-B0-5713-01	GEFITINIB	EGFR	EGFR	0.6876	1	0.727994	0.500569	1
TCGA-B0-5713-01	SIROLIMUS	EGFR	EGFR	0.6876	1	1	0.6876	2
TCGA-B0-5713-01	PACLITAXEL	EGFR	EGFR	0.6876	1	1	0.6876	2
TCGA-B0-5713-01	GSK2126458	PIK3CA	PIK3CA	0.6235	1	0.999739	0.623337	2
TCGA-B0-5713-01	MK-2206	PIK3CA	PIK3CA	0.6235	1	0.959349	0.598154	2
TCGA-B0-5713-01	CUDC-101	EGFR	EGFR	0.6876	1	0.994026	0.683492	3
TCGA-B8-4143-01	SORAFENIB	BRAF	BRAF	0.5242	1	0.999991	0.524195	1
TCGA-B8-4143-01	VEMURAFENIB	BRAF	BRAF	0.5242	1	0.999399	0.523885	1
TCGA-B8-4143-01	REGORAFENIB	BRAF	BRAF	0.5242	1	0.987808	0.517809	1
TCGA-B8-5159-01	DANAZOL	AR	AR	0.6359	1	0.912131	0.580024	2
TCGA-B8-5553-01	GSK2126458	PIK3R2	PIK3R2	0.5168	1	0.999739	0.516665	2
TCGA-B8-5553-01	SOPHORETIN	PIK3R2	PIK3R2	0.5168	1	1	0.5168	3
TCGA-BP-4160-01	EVEROLIMUS	PIK3CA	PIK3CA	0.6235	1	1	0.6235	1
TCGA-BP-4160-01	CABOZANTINIB	PIK3CA	PIK3CA	0.6235	1	0.999913	0.623446	1
TCGA-BP-4160-01	GSK2126458	PIK3CA	PIK3CA	0.6235	1	0.999739	0.623337	2
TCGA-BP-4160-01	MK-2206	PIK3CA	PIK3CA	0.6235	1	0.959349	0.598154	2
TCGA-BP-4160-01	VINORELBINE	BRCA1	BRCA1	0.5705	1	0.999997	0.570498	2
TCGA-BP-4161-01	EVEROLIMUS	PTEN	PTEN	0.699	1	1	0.699	1
TCGA-BP-4161-01	VANDETANIB	PTEN	PTEN	0.699	1	0.875357	0.611875	1
TCGA-BP-4161-01	ERLOTINIB	PTEN	PTEN	0.699	1	0.860542	0.601519	1
TCGA-BP-4161-01	GEFITINIB	PTEN	PTEN	0.699	1	0.727994	0.508868	1
TCGA-BP-4161-01	PACLITAXEL	PTEN	PTEN	0.699	1	1	0.699	2
TCGA-BP-4161-01	GSK2126458	PTEN	PTEN	0.699	1	0.999739	0.698817	2
TCGA-BP-4176-01	DOXORUBICIN	TP53	TP53	1	1	0.519849	0.519849	2
TCGA-BP-4341-01	VANDETANIB	EGFR	EGFR	0.6876	1	0.875357	0.601896	1
TCGA-BP-4341-01	ERLOTINIB	EGFR	EGFR	0.6876	1	0.860542	0.591709	1
TCGA-BP-4341-01	GEFITINIB	EGFR	EGFR	0.6876	1	0.727994	0.500569	1
TCGA-BP-4341-01	SIROLIMUS	EGFR	EGFR	0.6876	1	1	0.6876	2
TCGA-BP-4341-01	PACLITAXEL	EGFR	EGFR	0.6876	1	1	0.6876	2
TCGA-BP-4341-01	CUDC-101	EGFR	EGFR	0.6876	1	0.994026	0.683492	3
TCGA-BP-4354-01	VANDETANIB	EGFR	EGFR	0.6876	1	0.875357	0.601896	1
TCGA-BP-4354-01	ERLOTINIB	EGFR	EGFR	0.6876	1	0.860542	0.591709	1
TCGA-BP-4354-01	GEFITINIB	EGFR	EGFR	0.6876	1	0.727994	0.500569	1
TCGA-BP-4354-01	SIROLIMUS	EGFR	EGFR	0.6876	1	1	0.6876	2
TCGA-BP-4354-01	PACLITAXEL	EGFR	EGFR	0.6876	1	1	0.6876	2
TCGA-BP-4354-01	LIDOCAINE	EGFR	EGFR	0.6876	1	0.770651	0.5299	2
TCGA-BP-4354-01	CUDC-101	EGFR	EGFR	0.6876	1	0.994026	0.683492	3
TCGA-BP-4770-01	DOXORUBICIN	TP53	TP53	1	1	0.519849	0.519849	2
TCGA-BP-4797-01	BORTEZOMIB	NFKB1	NFKB1	0.5508	1	0.999999	0.5508	1
TCGA-BP-4960-01	EVEROLIMUS	PIK3CA	PIK3CA	0.6235	1	1	0.6235	1
TCGA-BP-4960-01	CABOZANTINIB	PIK3CA	PIK3CA	0.6235	1	0.999913	0.623446	1
TCGA-BP-4960-01	GSK2126458	PIK3CA	PIK3CA	0.6235	1	0.999739	0.623337	2
TCGA-BP-4960-01	MK-2206	PIK3CA	PIK3CA	0.6235	1	0.959349	0.598154	2
TCGA-BP-4998-01	VINORELBINE	BRCA1	BRCA1	0.5705	1	0.999997	0.570498	2
TCGA-CJ-4643-01	VINORELBINE	BRCA1	BRCA1	0.5705	1	0.999997	0.570498	2
TCGA-CJ-4868-01	VANDETANIB	EGFR	EGFR	0.6876	1	0.875357	0.601896	1
TCGA-CJ-4868-01	ERLOTINIB	EGFR	EGFR	0.6876	1	0.860542	0.591709	1
TCGA-CJ-4868-01	GEFITINIB	EGFR	EGFR	0.6876	1	0.727994	0.500569	1
TCGA-CJ-4868-01	SIROLIMUS	EGFR	EGFR	0.6876	1	1	0.6876	2
TCGA-CJ-4868-01	PACLITAXEL	EGFR	EGFR	0.6876	1	1	0.6876	2
TCGA-CJ-4868-01	LIDOCAINE	EGFR	EGFR	0.6876	1	0.770651	0.5299	2
TCGA-CJ-4868-01	CUDC-101	EGFR	EGFR	0.6876	1	0.994026	0.683492	3
TCGA-CJ-4873-01	EVEROLIMUS	PIK3CA	PIK3CA	0.6235	1	1	0.6235	1
TCGA-CJ-4873-01	CABOZANTINIB	PIK3CA	PIK3CA	0.6235	1	0.999913	0.623446	1
TCGA-CJ-4873-01	GSK2126458	PIK3CA	PIK3CA	0.6235	1	0.999739	0.623337	2
TCGA-CJ-4873-01	MK-2206	PIK3CA	PIK3CA	0.6235	1	0.959349	0.598154	2
TCGA-CJ-4874-01	EVEROLIMUS	HRAS	HRAS	0.5483	1	1	0.5483	1
TCGA-CJ-4886-01	EVEROLIMUS	PIK3CA	PIK3CA	0.6235	1	1	0.6235	1
TCGA-CJ-4886-01	CABOZANTINIB	PIK3CA	PIK3CA	0.6235	1	0.999913	0.623446	1
TCGA-CJ-4886-01	GSK2126458	PIK3CA	PIK3CA	0.6235	1	0.999739	0.623337	2
TCGA-CJ-4886-01	MK-2206	PIK3CA	PIK3CA	0.6235	1	0.959349	0.598154	2
TCGA-CJ-4908-01	BORTEZOMIB	FGFR3	FGFR3	0.5056	1	0.999999	0.5056	1
TCGA-CJ-5677-01	DOXORUBICIN	TP53	TP53	1	1	0.519849	0.519849	2
TCGA-CJ-6033-01	EVEROLIMUS	PIK3CA	PIK3CA	0.6235	1	1	0.6235	1
TCGA-CJ-6033-01	CABOZANTINIB	PIK3CA	PIK3CA	0.6235	1	0.999913	0.623446	1
TCGA-CJ-6033-01	GSK2126458	PIK3CA	PIK3CA	0.6235	1	0.999739	0.623337	2
TCGA-CJ-6033-01	MK-2206	PIK3CA	PIK3CA	0.6235	1	0.959349	0.598154	2
TCGA-CW-5585-01	LENVATINIB	PDGFRA	PDGFRA	0.5179	1	1	0.5179	1
TCGA-CW-5585-01	SORAFENIB	PDGFRA	PDGFRA	0.5179	1	0.999991	0.517896	1
TCGA-CW-5585-01	VATALANIB	PDGFRA	PDGFRA	0.5179	1	1	0.5179	2
TCGA-CW-5585-01	AMUVATINIB	PDGFRA	PDGFRA	0.5179	1	1	0.5179	2
TCGA-CW-5585-01	TELATINIB	PDGFRA	PDGFRA	0.5179	1	0.970063	0.502396	3
TCGA-CZ-4853-01	VINORELBINE	BRCA1	BRCA1	0.5705	1	0.999997	0.570498	2
TCGA-CZ-4857-01	GSK2126458	PIK3R1	PIK3R1	0.5807	1	0.999739	0.580548	2
TCGA-CZ-4865-01	DOXORUBICIN	TP53	TP53	1	1	0.519849	0.519849	2
TCGA-CZ-5463-01	DOXORUBICIN	TP53	TP53	1	1	0.519849	0.519849	2
TCGA-CZ-5466-01	LENVATINIB	PDGFRA	PDGFRA	0.5179	1	1	0.5179	1
TCGA-CZ-5466-01	SORAFENIB	PDGFRA	PDGFRA	0.5179	1	0.999991	0.517896	1
TCGA-CZ-5466-01	VATALANIB	PDGFRA	PDGFRA	0.5179	1	1	0.5179	2
TCGA-CZ-5466-01	AMUVATINIB	PDGFRA	PDGFRA	0.5179	1	1	0.5179	2
TCGA-CZ-5466-01	TELATINIB	PDGFRA	PDGFRA	0.5179	1	0.970063	0.502396	3
TCGA-CZ-5467-01	LENVATINIB	PDGFRA	PDGFRA	0.5179	1	1	0.5179	1
TCGA-CZ-5467-01	SORAFENIB	PDGFRA	PDGFRA	0.5179	1	0.999991	0.517896	1
TCGA-CZ-5467-01	VATALANIB	PDGFRA	PDGFRA	0.5179	1	1	0.5179	2
TCGA-CZ-5467-01	AMUVATINIB	PDGFRA	PDGFRA	0.5179	1	1	0.5179	2
TCGA-CZ-5467-01	TELATINIB	PDGFRA	PDGFRA	0.5179	1	0.970063	0.502396	3
